# Supplementary material for: Duplication and Gene Conversion in the Drosophila melanogaster Genome
Source: PubMed Central journal article supplement (PMC2588116; doi:10.1371/journal.pgen.1000305), 2008-12-12

## Figure S2 — Pre-speciation block 1

A) Duplication block in melanogaster subgroup (DNA sequence, Kimura's distance)

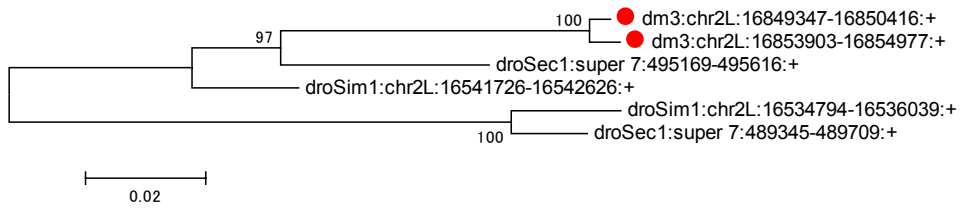

## Figure S2 — Pre-speciation block 2

A) Duplication block in melanogaster subgroup (DNA sequence, Kimura's distance)

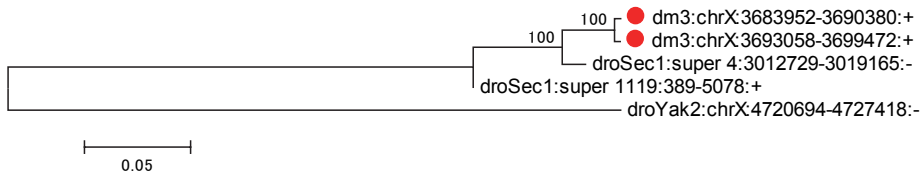

B) Window plot

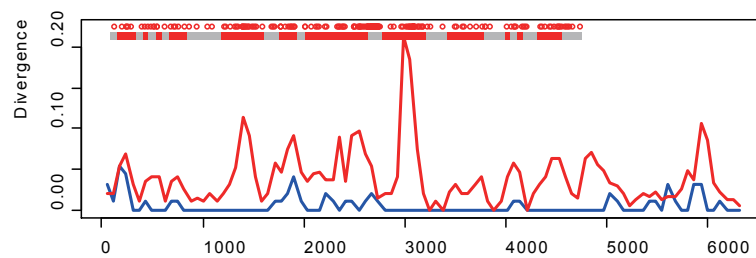

## Figure S2 — Pre-speciation block 3

A) Duplication block in melanogaster subgroup (DNA sequence, Kimura's distance)

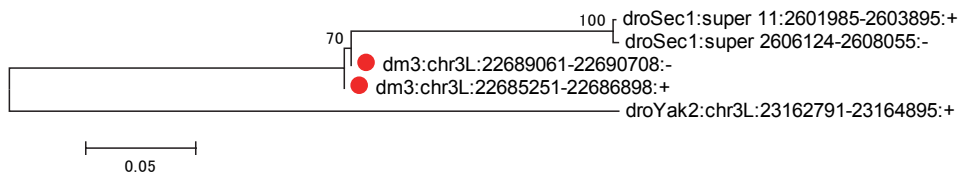

B) Window plot

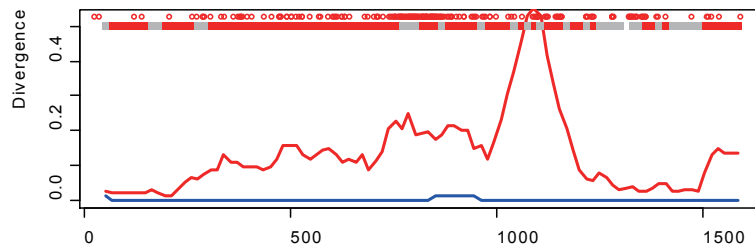

## Figure S2 — Pre-speciation block 4

A) Duplication block in melanogaster subgroup (DNA sequence, Kimura's distance)

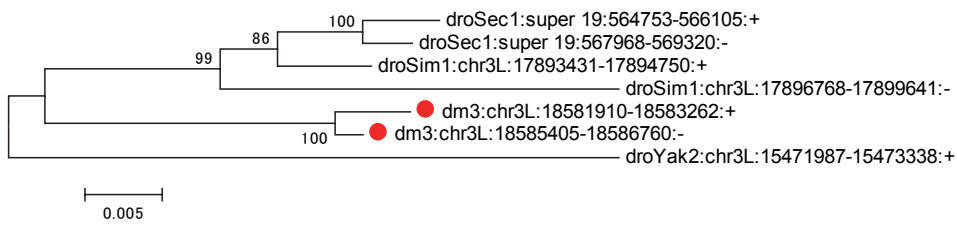

B) Window plot

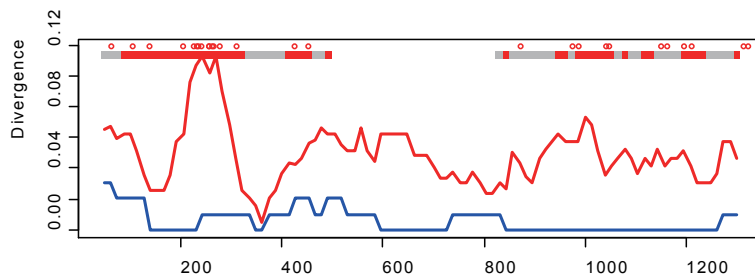

## Figure S2 — Pre-speciation block 5

A) Duplication block in melanogaster subgroup (DNA sequence, Kimura's distance)

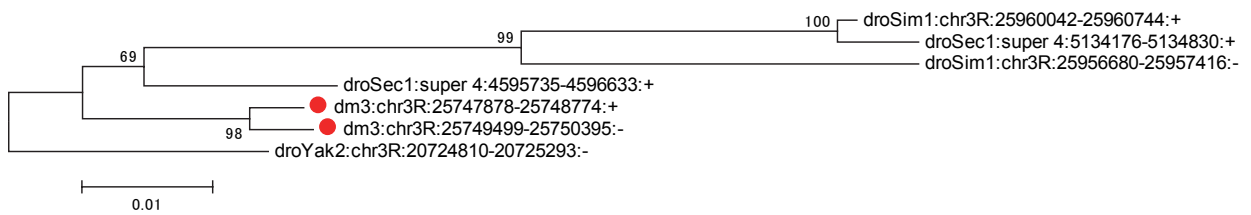

B) Window plot

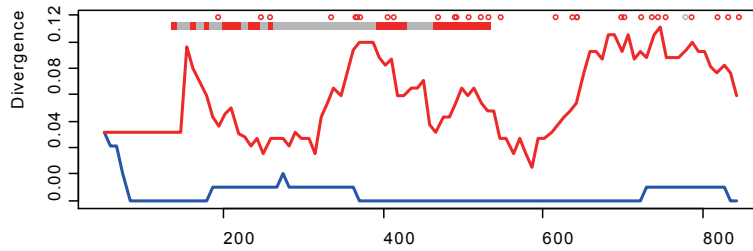

## Figure S2 — Pre-speciation block 6

A) Duplication block in melanogaster subgroup (DNA sequence, Kimura's distance)

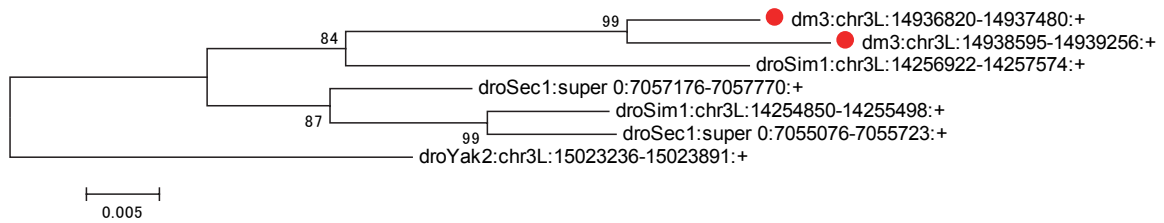

B) Window plot

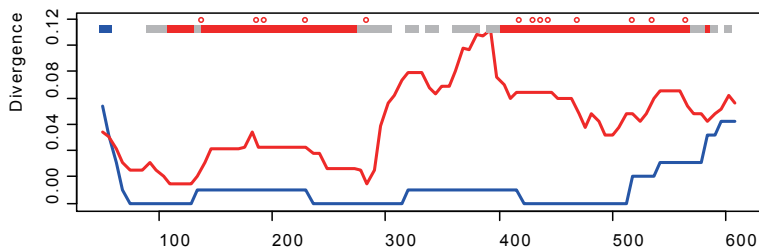

## Figure S2 — Pre-speciation block 7

A) Duplication block in melanogaster subgroup (DNA sequence, Kimura's distance)

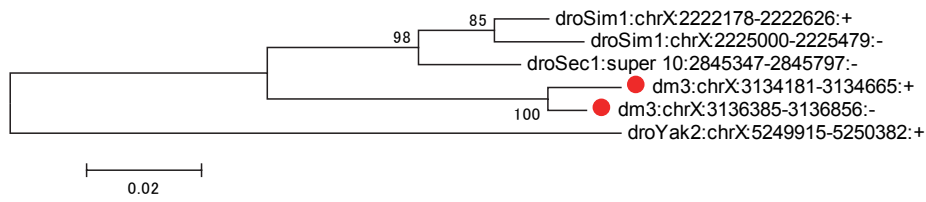

B) Window plot

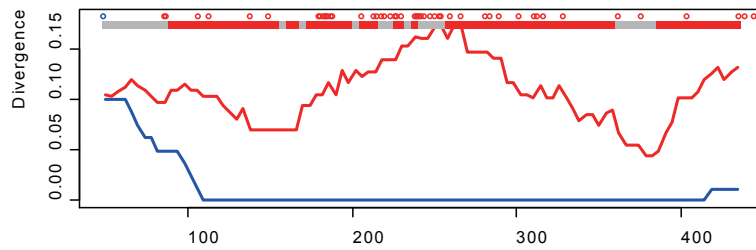

## Figure S2 — Pre-speciation block 8

A) Duplication block in melanogaster subgroup (DNA sequence, Kimura's distance)

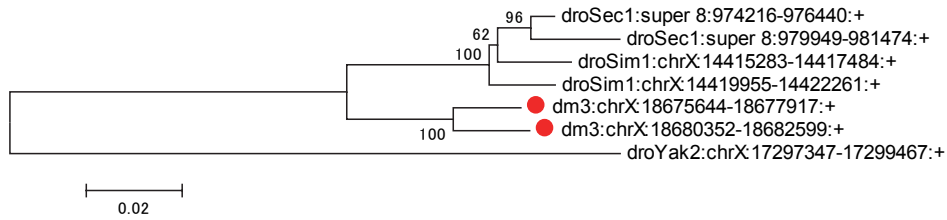

B) Window plot

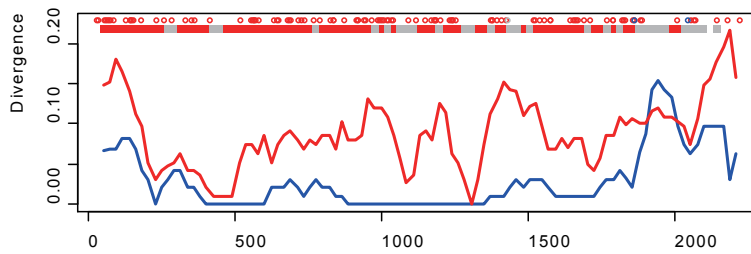



## Figure S2 — Pre-speciation block 9

A) Duplication block in melanogaster subgroup (DNA sequence, Kimura's distance)

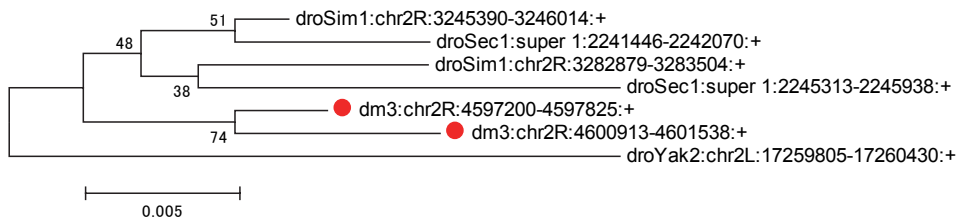

B) Window plot

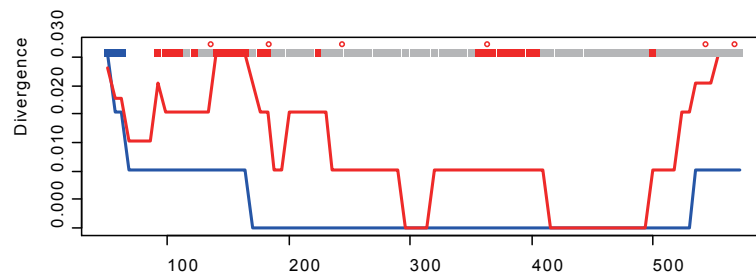

## Figure S2 — Pre-speciation block 10

A) Duplication block in melanogaster subgroup (DNA sequence, Kimura's distance)

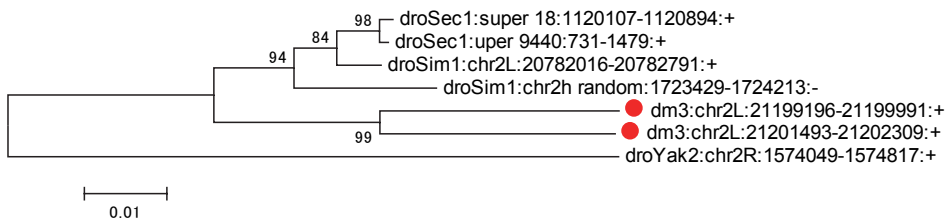

B) Window plot

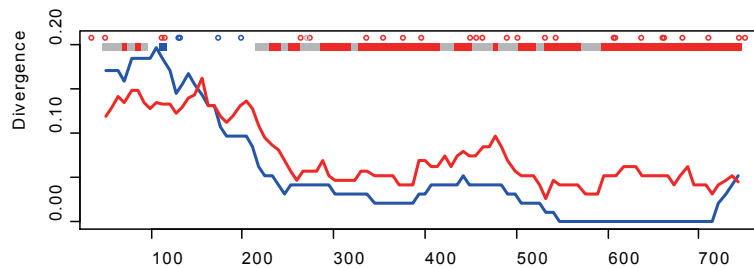

## Figure S2 — Pre-speciation block 11

A) Duplication block in melanogaster subgroup (DNA sequence, Kimura's distance)

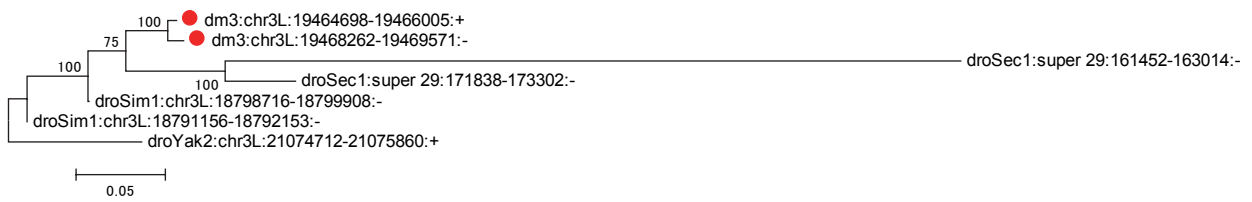

B) Window plot

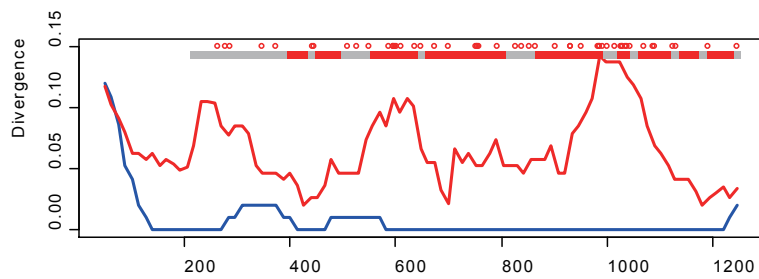

## Figure S2 — Pre-speciation block 12

A) Duplication block in melanogaster subgroup (DNA sequence, Kimura's distance)

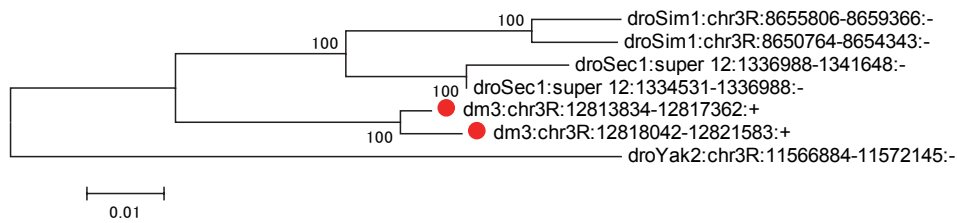

B) Window plot

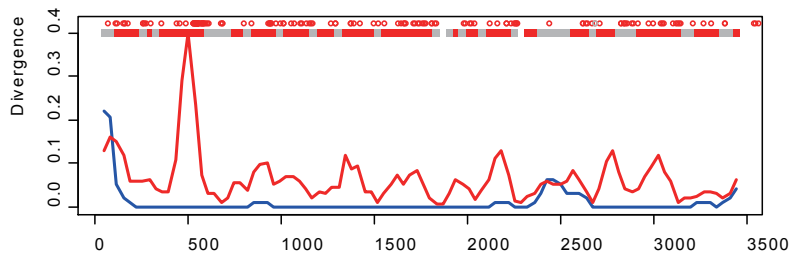

## Figure S2 — Pre-speciation block 13

A) Duplication block in melanogaster subgroup (DNA sequence, Kimura's distance)

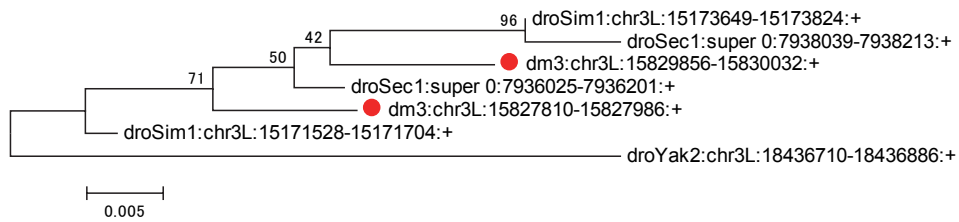

B) Window plot

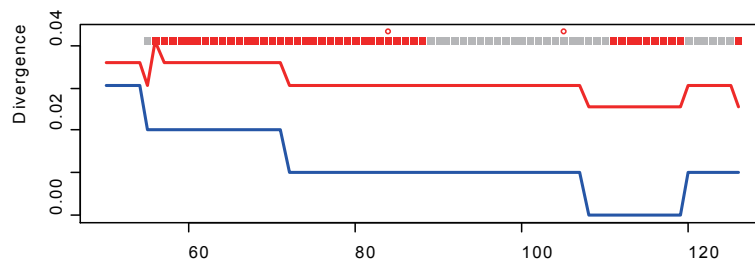

## Figure S2 — Pre-speciation block 14

A) Duplication block in melanogaster subgroup (DNA sequence, Kimura's distance)

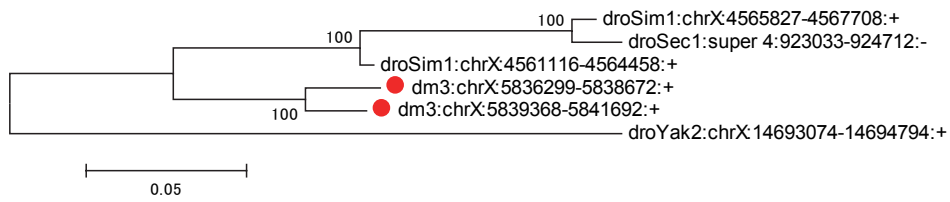

B) Window plot

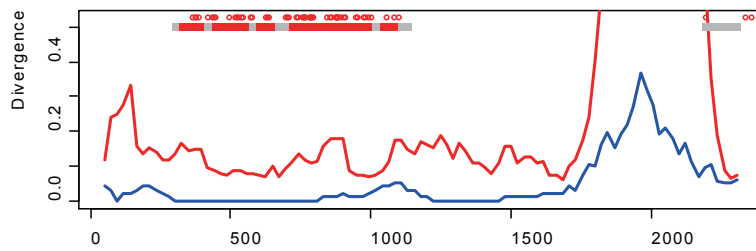

## Figure S2 — Pre-speciation block 15

A) Duplication block in melanogaster subgroup (DNA sequence, Kimura's distance)

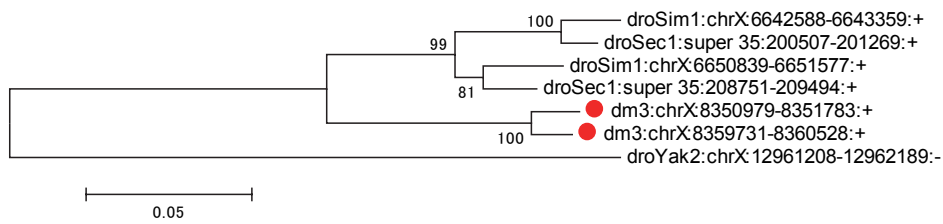

B) Window plot

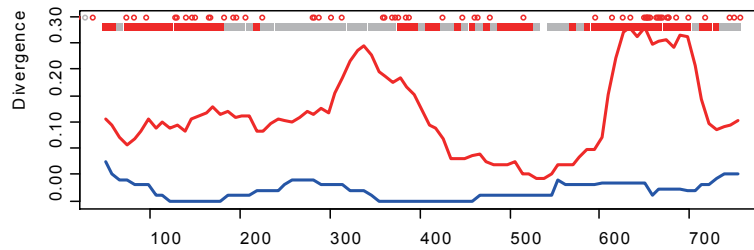

## Figure S2 — Pre-speciation block 16

A) Duplication block in melanogaster subgroup (DNA sequence, Kimura's distance)

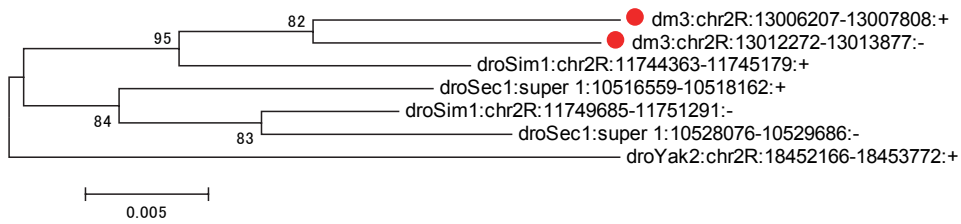

B) Window plot

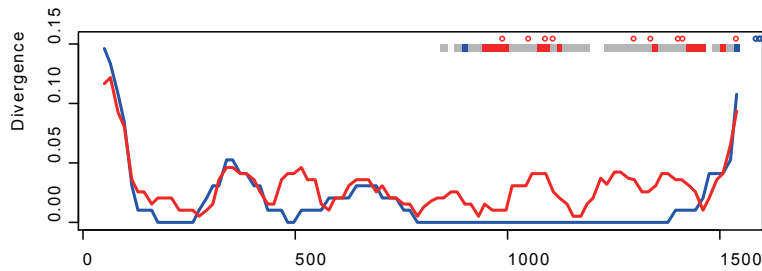



## Figure S2 — Pre-speciation block 17

A) Duplication block in melanogaster subgroup (DNA sequence, Kimura's distance)

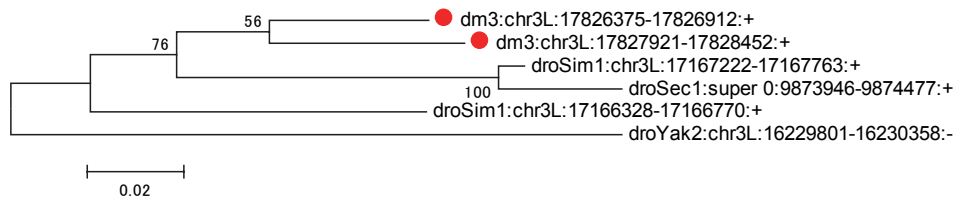

B) Window plot

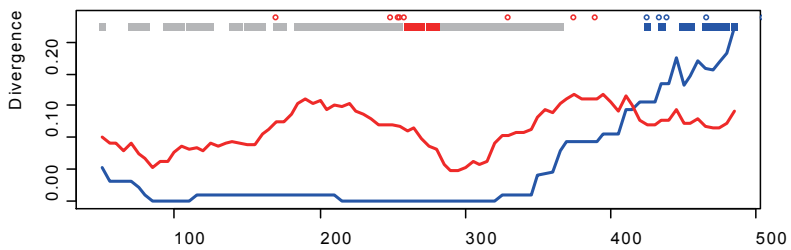

## Figure S2 — Pre-speciation block 18

A) Duplication block in melanogaster subgroup (DNA sequence, Kimura's distance)

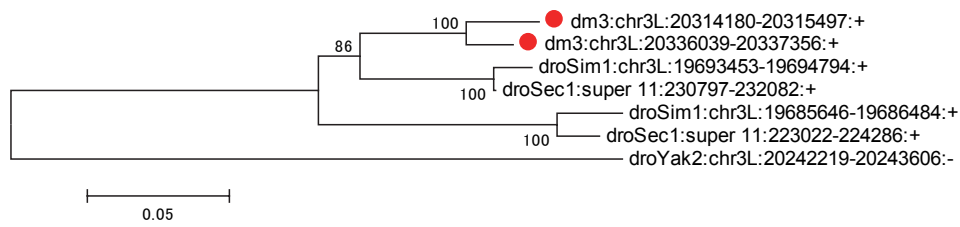

B) Window plot

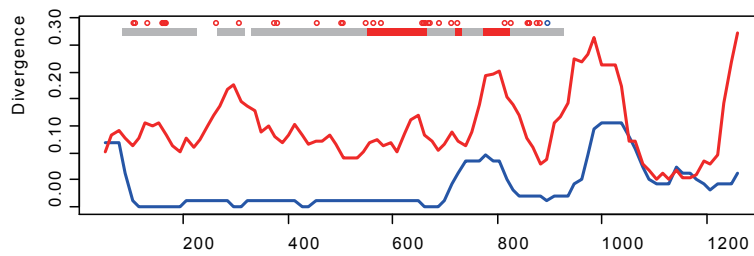

## Figure S2 — Pre-speciation block 19

A) Duplication block in melanogaster subgroup (DNA sequence, Kimura's distance)

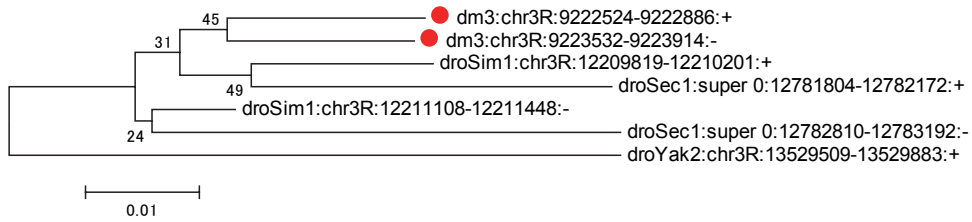

B) Window plot

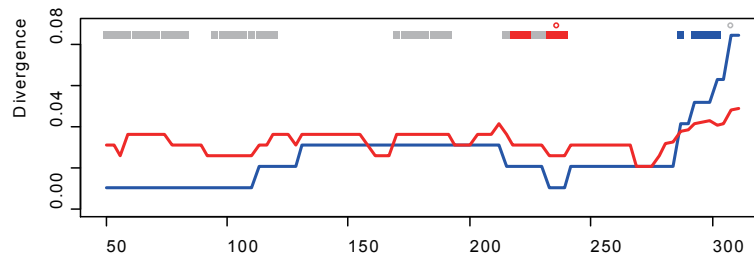

## Figure S2 — Pre-speciation block 20

A) Duplication block in melanogaster subgroup (DNA sequence, Kimura's distance)

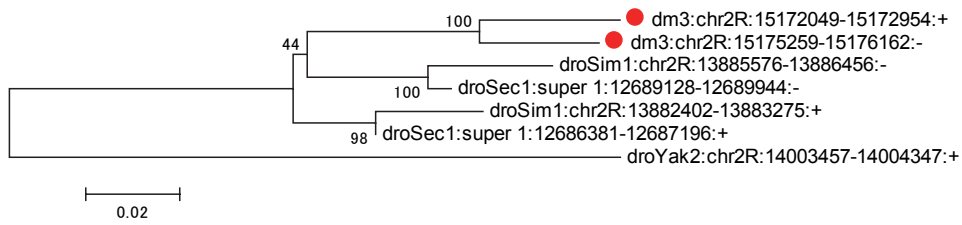

B) Window plot

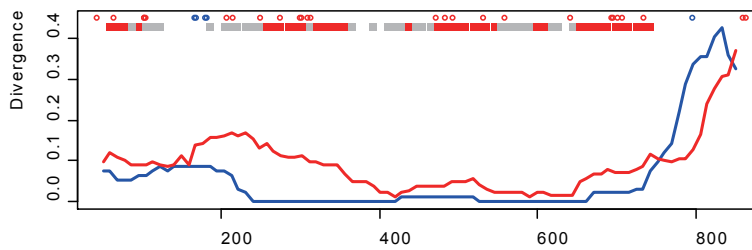

## Figure S2 — Pre-speciation block 21

A) Duplication block in melanogaster subgroup (DNA sequence, Kimura's distance)

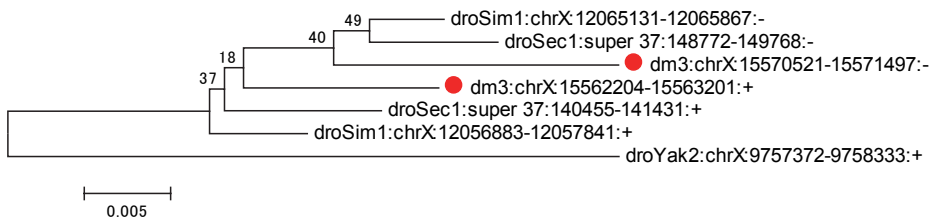

B) Window plot

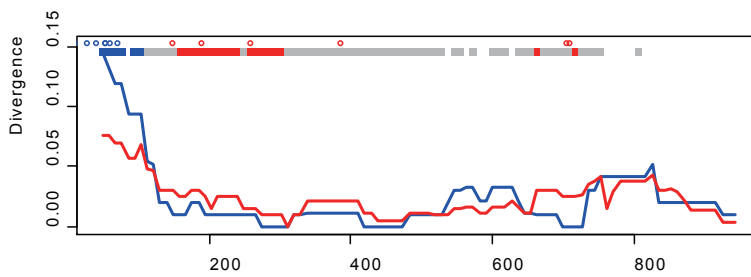

## Figure S2 — Pre-speciation block 22

A) Duplication block in melanogaster subgroup (DNA sequence, Kimura's distance)

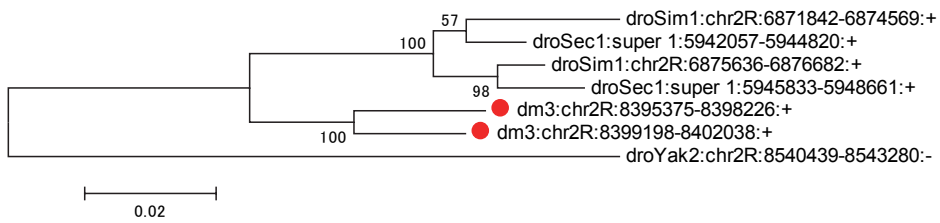

B) Window plot

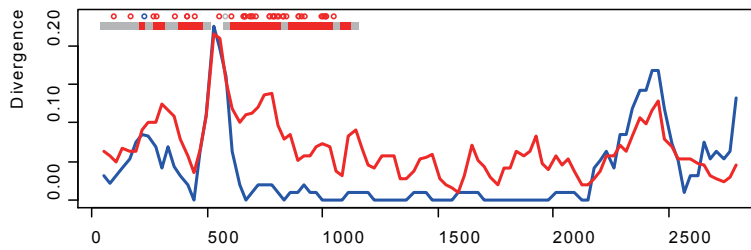

## Figure S2 — Pre-speciation block 23

A) Duplication block in melanogaster subgroup (DNA sequence, Kimura's distance)

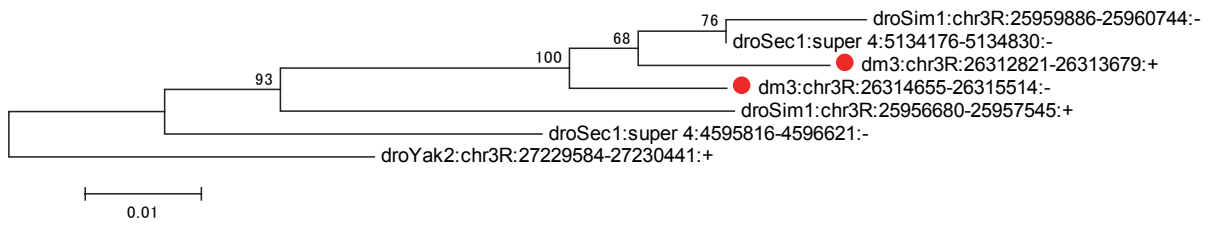

B) Window plot

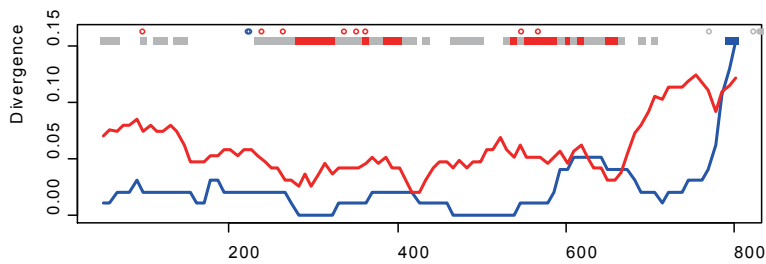

## Figure S2 — Pre-speciation block 24

A) Duplication block in melanogaster subgroup (DNA sequence, Kimura's distance)

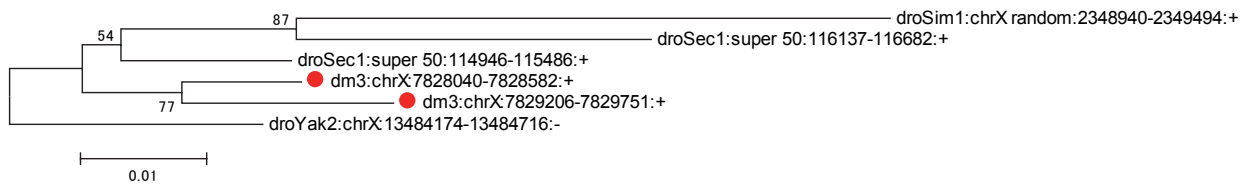

B) Window plot

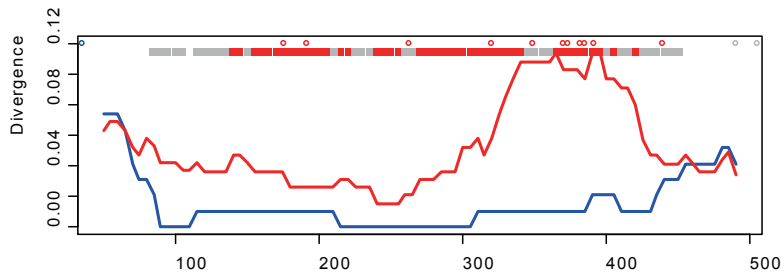



## Figure S2 — Pre-speciation block 25

A) Duplication block in melanogaster subgroup (DNA sequence, Kimura's distance)

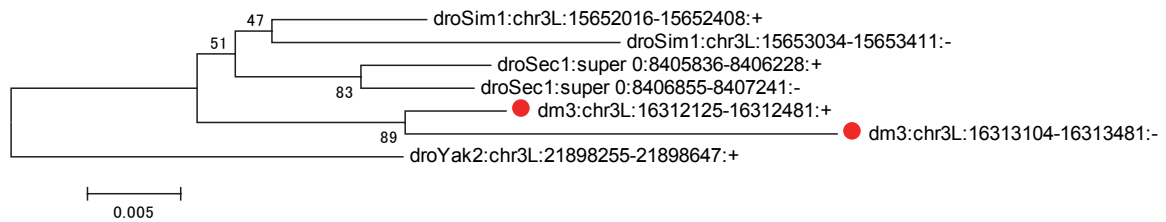

B) Window plot

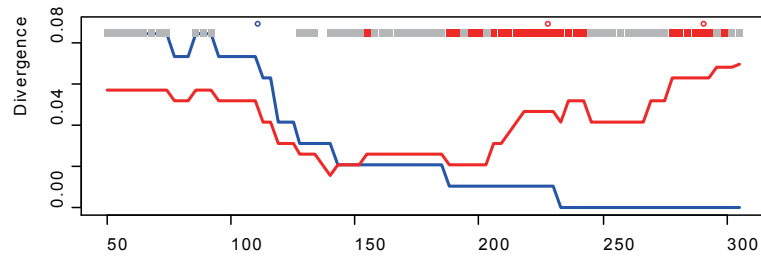

## Figure S2 — Pre-speciation block 26

A) Duplication block in melanogaster subgroup (DNA sequence, Kimura's distance)

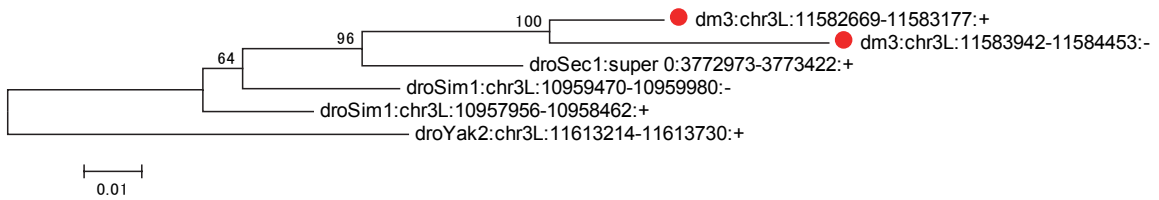

B) Window plot

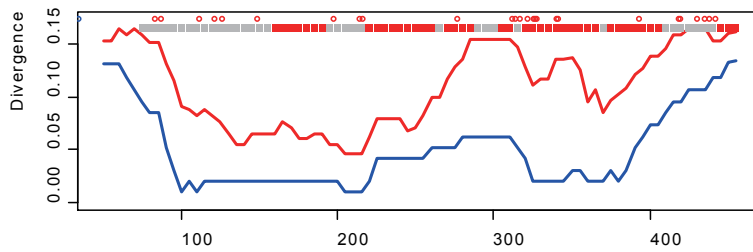

## Figure S2 — Pre-speciation block 27

A) Duplication block in melanogaster subgroup (DNA sequence, Kimura's distance)

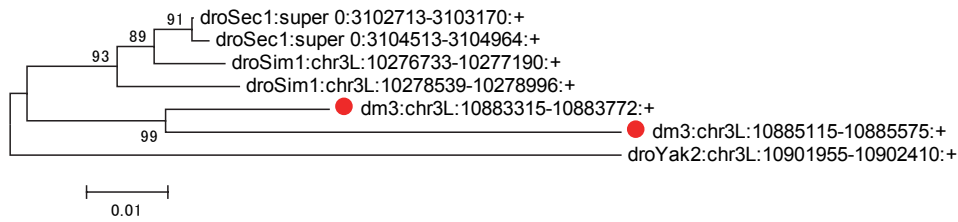

B) Window plot

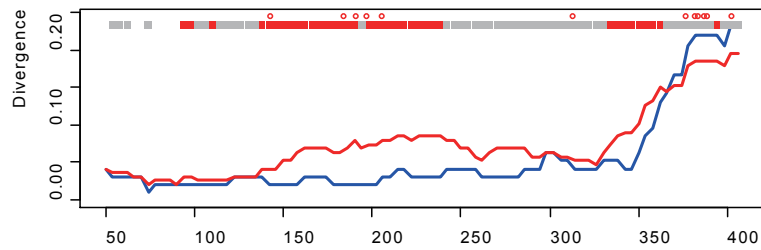

## Figure S2 — Pre-speciation block 28

A) Duplication block in melanogaster subgroup (DNA sequence, Kimura's distance)

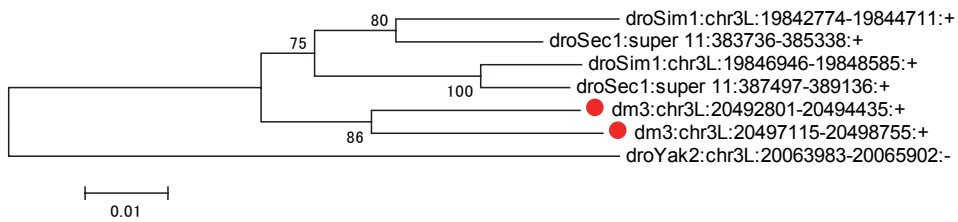

B) Window plot

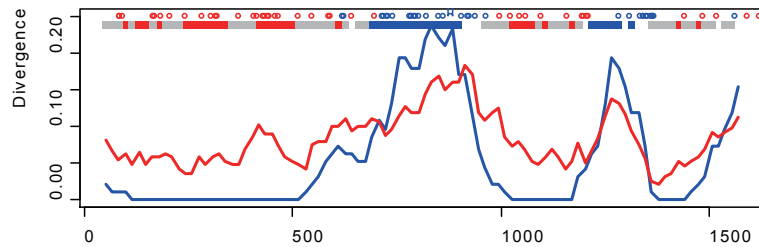

## Figure S2 — Pre-speciation block 29

A) Duplication block in melanogaster subgroup (DNA sequence, Kimura's distance)

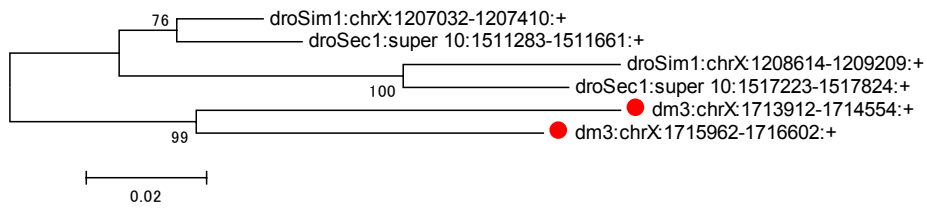

## Figure S2 — Pre-speciation block 30

A) Duplication block in melanogaster subgroup (DNA sequence, Kimura's distance)

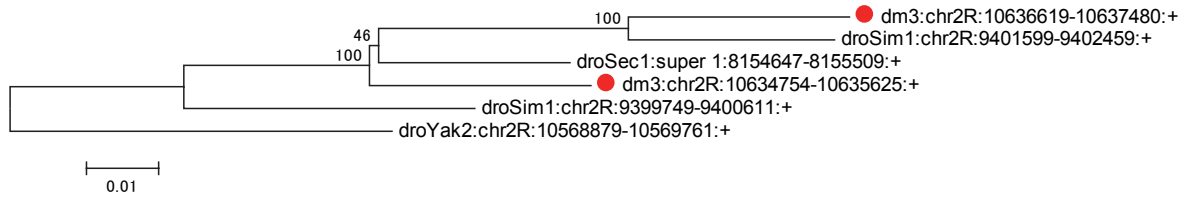

B) Window plot

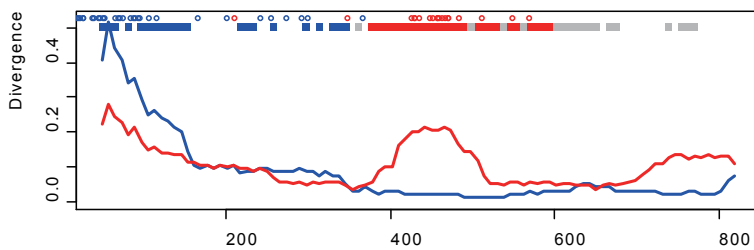

Supplement: pgen.1000305.s002.pdf [file pgen.1000305.s002.pdf]
