# Supplementary material for: Duplication and Gene Conversion in the Drosophila melanogaster Genome
Source: PubMed Central journal article supplement (PMC2588116; doi:10.1371/journal.pgen.1000305), 2008-12-12
Supplement: pgen.1000305.s003.pdf [file pgen.1000305.s003.pdf]

Figure S3 — Protein trees for Pre28

A Peak 1 (181 - 267 aa)

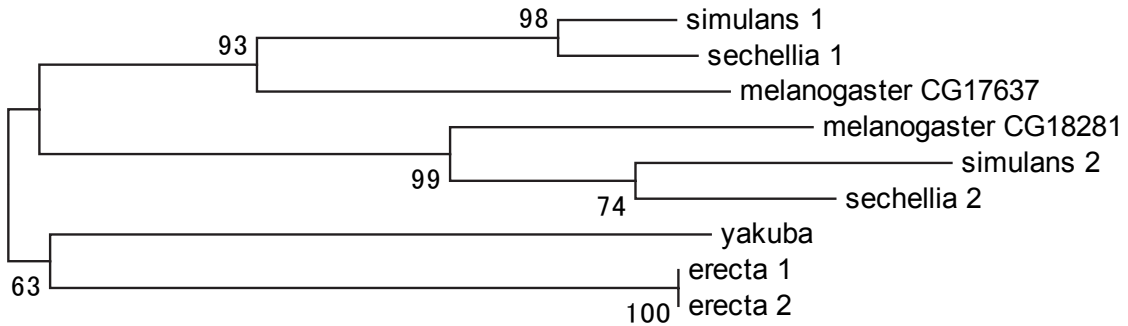

B Peak 2 (364 - 391 aa)

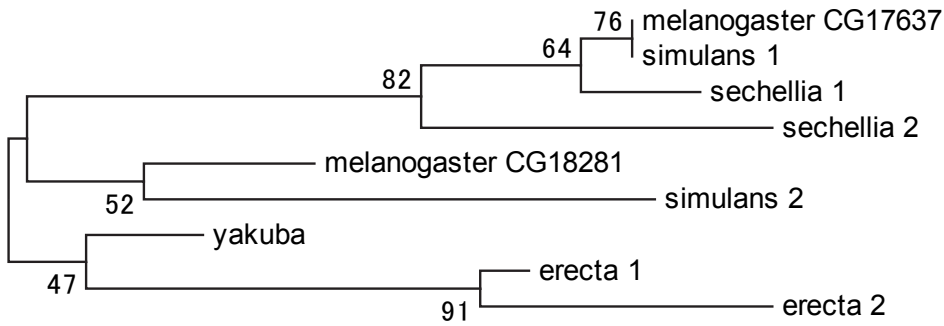

C Other regions

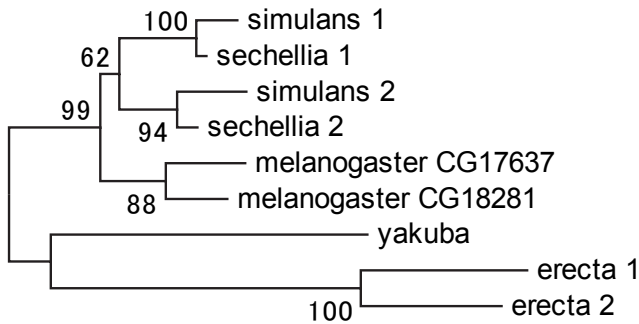

0.05
